# Supplementary material for: Predictive value of improvement in the immune tumour microenvironment in patients with breast cancer treated with neoadjuvant chemotherapy
Source: PubMed Central journal article supplement (PMC6135412; doi:10.1136/esmoopen-2017-000305), 2018-08-30

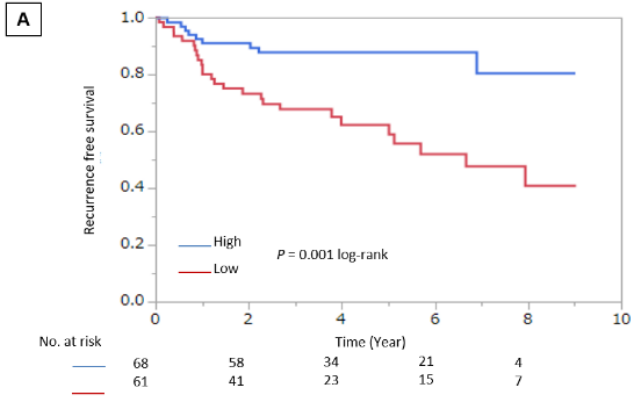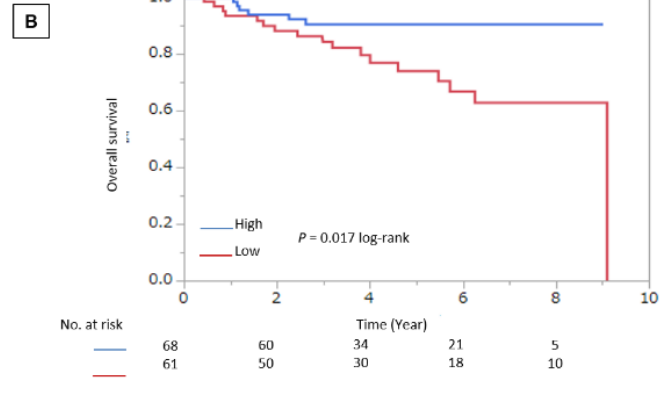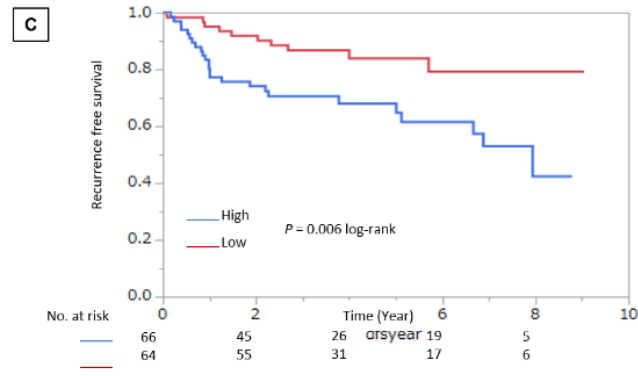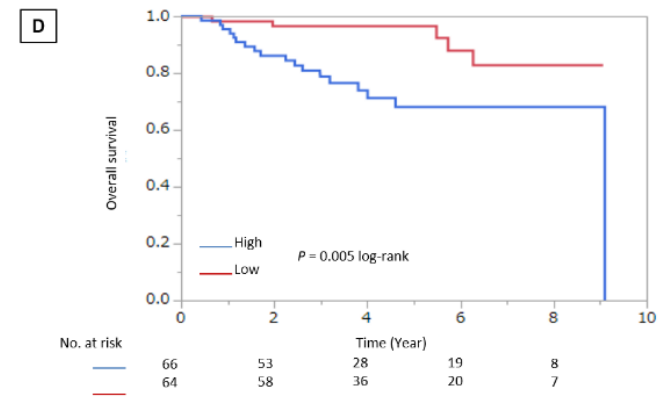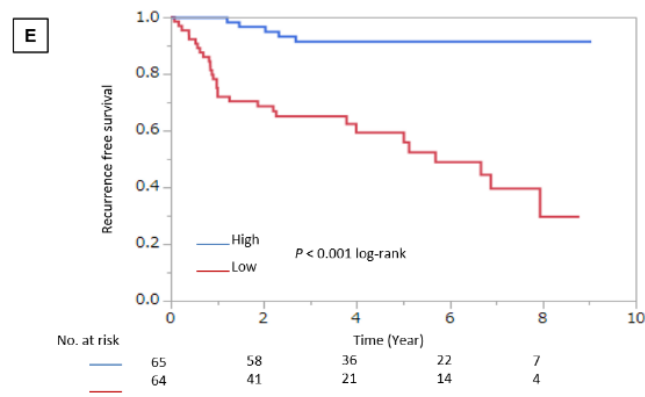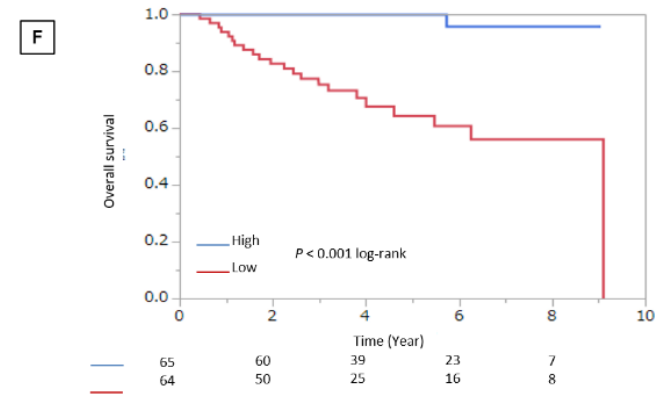

Supplement: esmoopen-2017-000305supp004.pdf [file esmoopen-2017-000305supp004.pdf]
